# Supplementary material for: The comparative immunology of wild and laboratory mice, Mus musculus domesticus
Source: PubMed Central journal article supplement (PMC5418598; doi:10.1038/ncomms14811), 2017-05-03
Supplement: ncomms14811-s1.pdf [file ncomms14811-s1.pdf]

**(a) Phenotyping of lymphocytes and other myeloid cells**

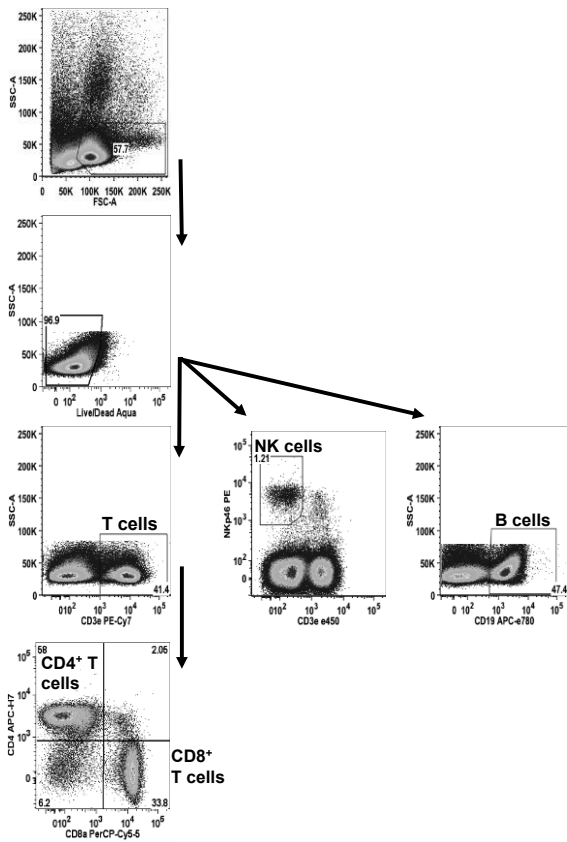

**(b) Phenotyping of dendritic cells and other myeloid cells**

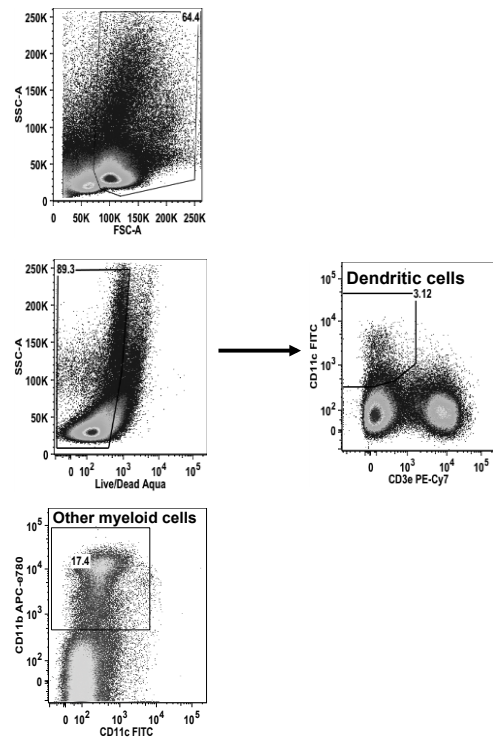

**Supplementary Figure 1. Flow cytometry gating strategies.** (a) For lymphocytes, live cells are gated from the lymphocyte population (FSC vs. SSC plot); T cells are CD3 $\epsilon$ <sup>+</sup> cells, which are further subdivided into CD4<sup>+</sup> or CD8<sup>+</sup>. NK cells are NKp46<sup>+</sup> CD3 $\epsilon$ <sup>-</sup> and B cells are CD19<sup>+</sup>. (b) For myeloid cells, dendritic cells are CD11c<sup>+</sup> CD3 $\epsilon$ <sup>-</sup> and other myeloid cells are CD11b<sup>+</sup> CD11c<sup>-</sup>.

| Site code | OS grid reference | Site description                | Number of mice |
|-----------|-------------------|---------------------------------|----------------|
| HW        | ST 506 671        | Mixed arable and beef farm      | 181            |
| PH        | ST 532 595        | Dairy farm                      | 66             |
| JB        | ST 595 652        | Stables and livery              | 36             |
| BM        | ST 523 686        | Grain merchant and mill         | 35             |
| GL        | SO 786 087        | Beef farm                       | 33             |
| SK        | SM 737 050        | Island, bird observatory        | 33             |
| WF        | SO 882 004        | Dairy farm and cheese producer  | 18             |
| LU        | TQ 290 812        | London Underground <sup>1</sup> | 18             |
| ST        | ST 524 688        | Beef and dairy farm             | 15             |
| PF        | ST 554 710        | Dairy farm                      | 10             |
| WT        | SO 818 058        | Dairy farm                      | 8              |
| SP        | ST 665 670        | Dairy farm                      | 7              |

**Supplementary Table 1. Wild mouse sample sites.** OS is Ordnance Survey, UK.

<sup>1</sup>WM\_21, 22 Central Line, Oxford Circus station; WM\_261–274 and 441, Central Line, Holborn station; WM\_442 Piccadilly Line, Leicester Square station.

| Parameter                                                            | Laboratory                 |                             |                  | Wild                       |                            |                   | Lab. vs. Wild                                                             |
|----------------------------------------------------------------------|----------------------------|-----------------------------|------------------|----------------------------|----------------------------|-------------------|---------------------------------------------------------------------------|
|                                                                      | Female                     | Male                        | Female vs. Male  | Female                     | Male                       | Female vs. Male   |                                                                           |
| <sup>1</sup> CD3 <sup>+</sup> (%)                                    | 29.5<br>(21.5 - 66.2; 39)  | 35.9<br>(25.0 - 57.8; 24)   | <i>U</i> = 619 * | 45.9<br>(30.5 - 70.0; 53)  | 45.7<br>(17.6 - 82.0; 71)  | <i>U</i> = 1535   | <i>H</i> = 49.8 ***; LF < WF***,<br>LF < WM***, LM < WF***,<br>LM < WM*** |
| <sup>2</sup> CD4 <sup>+</sup> (%)                                    | 55.7<br>(43.9 - 70.5; 39)  | 55.6<br>(48.1 - 64.8; 24)   | <i>U</i> = 505   | 61.4<br>(43.7 - 80.4; 53)  | 59.7<br>(36.6 - 80.2; 71)  | <i>U</i> = 1520   | <i>U</i> = 1882 ***                                                       |
| <sup>3</sup> Naive CD4 <sup>+</sup> (%)                              | 62.0<br>(20.6 - 80.5; 39)  | 70.2<br>(14.5 - 80.9; 24)   | <i>U</i> = 565   | 41.1<br>(6.2 - 73.8; 53)   | 44.2<br>(5.6 - 68.8; 71)   | <i>U</i> = 2064   | <i>U</i> = 6059 ***                                                       |
| <sup>3</sup> Memory CD4 <sup>+</sup> (%)                             | 4.4<br>(1.4 - 17.1; 39)    | 4.5<br>(1.2 - 14.8; 24)     | <i>U</i> = 462   | 6.3<br>(1.4 - 17.1; 53)    | 6.1<br>(0.4 - 51.0; 71)    | <i>U</i> = 1751   | <i>U</i> = 2789 ***                                                       |
| <sup>3</sup> Effector CD4 <sup>+</sup> (%)                           | 11.5<br>(4.3 - 36.9; 39)   | 12.7<br>(6.4 - 34.4; 24)    | <i>U</i> = 469   | 33.6<br>(9.4 - 62.4; 53)   | 30.1<br>(2.7 - 54.0; 71)   | <i>U</i> = 1724   | <i>U</i> = 817 ***                                                        |
| <sup>2</sup> CD8 <sup>+</sup> (%)                                    | 38.3<br>(23.2 - 48.7; 39)  | 37.5<br>(30.3 - 43.7; 24)   | <i>U</i> = 423   | 30.4<br>(13.7 - 49.0; 52)  | 32.4<br>(11.3 - 53.8; 71)  | <i>U</i> = 1787   | <i>U</i> = 5831 ***                                                       |
| <sup>4</sup> Naive CD8 <sup>+</sup> (%)                              | 64.5<br>(24.0 - 78.0; 37)  | 68.7<br>(42.6 - 81.1; 24)   | <i>U</i> = 573   | 52.1<br>(11.6 - 70.8; 52)  | 52.6<br>(4.8 - 76.6; 71)   | <i>U</i> = 1900   | <i>U</i> = 5671 ***                                                       |
| <sup>4</sup> Memory CD8 <sup>+</sup> (%)                             | 19.6<br>(5.9 - 36.5; 37)   | 19.4<br>(3.9 - 29.4; 24)    | <i>U</i> = 439   | 16.3<br>(5.7 - 34.6; 52)   | 13.3<br>(1.3 - 29.0; 71)   | <i>U</i> = 1447 * | <i>H</i> = 13.3 **, LF > WM**,<br>LM > WM*                                |
| <sup>4</sup> Effector CD8 <sup>+</sup> (%)                           | 5.9<br>(2.0 - 16.5; 37)    | 4.4<br>(2.4 - 20.7; 24)     | <i>U</i> = 337   | 19.7<br>(3.0 - 49.2; 52)   | 19.0<br>(3.6 - 48.0; 71)   | <i>U</i> = 2027   | <i>U</i> = 611***                                                         |
| Terminally differentiated (KLRG1 <sup>+</sup> ) CD8 <sup>+</sup> (%) | 1.18<br>(0.01 - 14.0; 37)  | 1.3<br>(0.15 - 9.8; 24)     | <i>U</i> = 517   | 2.2<br>(0.00 - 20.5; 55)   | 3.0<br>(0.00 - 35.0; 68)   | <i>U</i> = 2229   | <i>U</i> = 2728**                                                         |
| CD4 <sup>+</sup> : CD8 <sup>+</sup> ratio                            | 1.47<br>(0.93 - 3.04; 39)  | 1.44<br>(1.20 - 2.14; 24)   | <i>U</i> = 486   | 2.1<br>(1.12 - 5.43; 50)   | 1.89<br>(0.98 - 7.07; 66)  | <i>U</i> = 1515   | <i>U</i> = 1535***                                                        |
| <sup>3</sup> CD25 <sup>+</sup> Foxp3 <sup>+</sup> (Treg) (%)         | 5.2<br>(1.8 - 11.2; 36)    | 4.4<br>(0.1 - 9.4; 23)      | <i>U</i> = 323   | 5.4<br>(0.7 - 11.9; 52)    | 6.4<br>(1.1 - 13.3; 63)    | <i>U</i> = 1649   | <i>U</i> = 2623*                                                          |
| Effector CD4 <sup>+</sup> : Treg ratio                               | 2.69<br>(1.16 - 6.69; 36)  | 2.76<br>(1.79 - 206.27; 23) | <i>U</i> = 512   | 7.08<br>(1.94 - 50.54; 49) | 4.86<br>(2.02 - 29.68; 62) | <i>U</i> = 1220   | <i>U</i> = 1179***                                                        |
| Effector CD8 <sup>+</sup> : Treg ratio                               | 0.96<br>(0.30 - 24.90; 33) | 1.25<br>(0.41 - 46.70; 19)  | <i>U</i> = 359   | 3.78<br>(0.50 - 38.47; 49) | 3.12<br>(0.57 - 30.38; 62) | <i>U</i> = 1308   | <i>U</i> = 947***                                                         |
| Terminally                                                           | 0.24<br>(0.00 - 2.17; 35)  | 0.43<br>(0.08 - 60.23; 23)  | <i>U</i> = 529 * | 0.55<br>(0.00 - 7.73; 49)  | 0.74<br>(0.00 - 22.15; 61) | <i>U</i> = 1670   | <i>H</i> = 9.7 *, LF < WM*                                                |

| differentiated CD8 <sup>+</sup> : Treg ratio        |                            |                            |           |                            |                            |           |                                                            |
|-----------------------------------------------------|----------------------------|----------------------------|-----------|----------------------------|----------------------------|-----------|------------------------------------------------------------|
| <sup>1</sup> CD19 <sup>+</sup> (%)                  | 46.9<br>(15.8 - 59.7; 37)  | 48.8<br>(18.6 - 61.6; 23)  | U = 456   | 43.9<br>(24.6 - 62.6; 58)  | 42.6<br>(18.9 - 60.0; 78)  | U = 2147  | U = 4676                                                   |
| <sup>5</sup> Naive CD19 <sup>+</sup> (%)            | 73.9<br>(48.6 - 90.7; 37)  | 81.9<br>(53.6 - 86.6; 23)  | U = 516   | 82.2<br>(65.1 - 89.7; 57)  | 82.6<br>(65.4 - 92.1; 76)  | U = 2356  | U = 2573 ***                                               |
| <sup>5</sup> Memory CD19 <sup>+</sup> (%)           | 15.26<br>(6.7 - 27.4; 37)  | 13.0<br>8.4 - 28.5; 23     | U = 340   | 11.1<br>(6.2 - 21.9; 57)   | 11.9<br>(5.5 - 18.7; 75)   | U = 2213  | U = 5180 ***                                               |
| <sup>5</sup> Germinal centre CD19 <sup>+</sup> (%)  | 0.4<br>(0.01 - 1.20; 37)   | 0.2<br>(0.05 - 1.29; 23)   | U = 282 * | 0.6<br>(0.14 - 6.93; 57)   | 0.7<br>(0.09 - 6.9; 75)    | U = 2314  | H = 32.6 ***; LF < WM**, LM < WF***, LM < WM***            |
| CD19 <sup>+</sup> PNA (MFI)                         | 990<br>(202 - 3161; 36)    | 1719<br>(447 - 2909; 23)   | U = 522   | 2123<br>(172 - 4297; 59)   | 1933<br>(232 - 5330; 74)   | U = 19001 | U = 2670 ***                                               |
| CD19 <sup>+</sup> MHC II (MFI)                      | 29209<br>(199 - 40838; 37) | 29200<br>(380 - 37683; 23) | U = 404   | 2070<br>(27 - 37760; 58)   | 2696<br>(23 - 36449; 74)   | U = 2331  | U = 7096 ***                                               |
| Naive CD19 <sup>+</sup> PNA (MFI)                   | 990<br>(192 - 3002; 36)    | 1650<br>(482 - 2803; 23)   | U = 523   | 1867<br>(160 - 4984; 57)   | 1800<br>(226 - 3861; 76)   | U = 2029  | U = 2840 ***                                               |
| Naive CD19 <sup>+</sup> MHC II (MFI)                | 35027<br>(253 - 44118; 37) | 31581<br>(477 - 43729; 23) | U = 341   | 2983<br>(-69 - 39714; 57)  | 2165<br>(7 - 27737; 76)    | U = 2047  | U = 7336 **                                                |
| Memory CD19 <sup>+</sup> PNA (MFI)                  | 959<br>(44 - 4265; 37)     | 2185<br>(384 - 3855; 23)   | U = 523   | 3535<br>(208 - 9370; 57)   | 3650<br>(308 - 9958; 75)   | U = 2059  | U = 1709 ***                                               |
| Memory CD19 <sup>+</sup> MHC II (MFI)               | 21559<br>(93 - 3194; 370)  | 24639<br>(196 - 33369; 23) | U = 502   | 2075<br>(-108 - 36449; 57) | 1603<br>(41 - 26307; 75)   | U = 1958  | U = 6838 ***                                               |
| Germinal centre CD19 <sup>+</sup> PNA (MFI)         | 966<br>(166 - 32804; 37)   | 6270<br>(411 - 30722; 23)  | U = 572 * | 20810<br>(213 - 54595; 57) | 14837<br>(294 - 59062; 75) | U = 1745  | H = 50.3 ***; LF < WF***, LF < WM***, LM < WF***, LM < WM* |
| Germinal centre CD19 <sup>+</sup> MHC II (MFI)      | 9894<br>(40 - 67858; 37)   | 18819<br>(208 - 7134; 23)  | U = 566 * | 2409<br>(-108 - 59478; 56) | 2798<br>(1 - 39530; 75)    | U = 1849  | H = 27.9 ***; LF > WM**, LM > WF**, LM > WM***             |
| CD3 <sup>+</sup> : CD19 <sup>+</sup> ratio          | 0.66<br>(0.36 - 4.00; 37)  | 0.72<br>(0.45 - 2.55; 23)  | U = 503   | 1.06<br>(0.50 - 2.85; 48)  | 1.03<br>(0.39 - 2.37; 66)  | U = 1551  | U = 1843***                                                |
| <sup>1</sup> CD11c <sup>+</sup> (%) Dendritic Cells | 2.7<br>(0.7 - 12.0; 40)    | 3.3<br>(1.5 - 16.9; 24)    | U = 662 * | 2.1<br>(0.7 - 9.3; 53)     | 2.1<br>(0.6 - 9.3; 73)     | U = 1771  | H = 16.0***; LM > WF***, LM > WM**                         |

|                                                        |                             |                             |             |                             |                             |              |                                                                                                                      |
|--------------------------------------------------------|-----------------------------|-----------------------------|-------------|-----------------------------|-----------------------------|--------------|----------------------------------------------------------------------------------------------------------------------|
| <b>CD11c<sup>+</sup> MHC II (MFI)</b>                  | 1472<br>(24 - 23837; 39)    | 1207<br>(648 - 3936; 22)    | $U = 379$   | 2395<br>(-79.2 - 26813; 51) | 782<br>(17.3 - 34110; 70)   | $U = 1530$   | $U = 3727$                                                                                                           |
| <b><sup>1</sup>CD11b<sup>+</sup> myeloid cells</b>     | 5.25<br>(0.1 - 10.2; 37)    | 5.91<br>(2.5 - 13.3; 24)    | $U = 580^*$ | 8.06<br>(0.3 - 20.9; 50)    | 8.37<br>(0.3 - 30.9; 68)    | $U = 1662$   | $H = 26.6^{***}$ , LF < WF <sup>***</sup> , LF < WM <sup>***</sup>                                                   |
| <b><sup>6</sup>M1: Tissue resident macrophages</b>     | 17.40<br>(6.65 - 43.10; 36) | 15.90<br>(5.53 - 33.40; 23) | $U = 409$   | 7.97<br>(2.39 - 39.40; 49)  | 8.26<br>(1.80 - 29.2; 67)   | $U = 1700$   | $U = 5733^{***}$                                                                                                     |
| <b><sup>6</sup>M2: Monocytes</b>                       | 18.05<br>(0.52 - 32.50; 36) | 18.50<br>(0.68 - 25.70; 23) | $U = 407$   | 16.00<br>(0.30 - 32.90; 49) | 14.80<br>(0.30 - 33.20; 67) | $U = 1606$   | $U = 4141^*$                                                                                                         |
| <b><sup>6</sup>M3: Hypergranulocytic myeloid cells</b> | 0.65<br>(0.00 - 3.07; 36)   | 0.37<br>(0.00 - 2.71; 23)   | $U = 291$   | 3.94<br>(0.00 - 28.90; 49)  | 2.11<br>(0.00 - 27.20; 67)  | $U = 1285^*$ | $H = 49.0^{***}$ , LF < WF <sup>***</sup> , LF < WM <sup>***</sup> , LM < WF <sup>***</sup> , LM < WM <sup>***</sup> |
| <b><sup>6</sup>M4: PMN</b>                             | 4.36<br>(0.00 - 20.70; 36)  | 5.68<br>(0.00 - 29.20; 23)  | $U = 420$   | 16.00<br>(0.00 - 46.80; 49) | 16.4<br>(0.00 - 42.8; 67)   | $U = 1738$   | $U = 1051^{***}$                                                                                                     |

**Supplementary Table 2. Characterisation of lymphocyte populations of wild mice and their comparison to laboratory mice.** The table shows the lymphocyte populations for wild and laboratory mice, shown as medians (range; n). Statistical results show comparisons between sex within animal source (*i.e.* laboratory or wild mice), and between animal source. Where there exists a significant difference between sex, mice were grouped by sex and animal source as: laboratory female, laboratory male, wild female and wild male (LF, LM, WF, WM, respectively), with Kruskal-Wallis H-tests (and post-hoc, Dunn-Bonferonni, pairwise comparisons) conducted with significant differences reported. All non-normal data were analysed by Mann-Whitney U-tests, unless stated otherwise. Asterisks denote significant differences as  $^* P < 0.05$ ,  $^{**} P < 0.01$ ,  $^{***} P < 0.001$ . Superscripts define cell populations as a percentage of: <sup>1</sup>spleen cells; <sup>2</sup>CD3<sup>+</sup> cells; <sup>3</sup>CD4<sup>+</sup> cells; <sup>4</sup>CD8<sup>+</sup> cells; <sup>5</sup>B cells; <sup>6</sup>CD11b<sup>+</sup> myeloid cells.

|                                                     | Prevalence %, median intensity <sup>1</sup> , (n) |                | Overall prevalence, median intensity <sup>1</sup> , (n) |
|-----------------------------------------------------|---------------------------------------------------|----------------|---------------------------------------------------------|
|                                                     | Female Mice                                       | Male Mice      |                                                         |
| <b>Nematode (<i>Syphacia</i> sp.)<sup>2</sup></b>   | 88, 42, (81)                                      | 93, 51, (100)  | 91, 40, (181)                                           |
| <b>Mites (<i>Mycoptes musculus</i>)<sup>3</sup></b> | 77, 300, (81)                                     | 86, 400, (100) | 82, 200, (181)                                          |
| <b>Noro<sup>4</sup></b>                             | 41 (70)                                           | 34 (83)        | 37 (153)                                                |
| <b>Minute<sup>4</sup></b>                           | 21 (70)                                           | 22 (83)        | 22 (153)                                                |
| <b>Parvo<sup>4</sup></b>                            | 89 (70)                                           | 94 (83)        | 92 (153)                                                |
| <b>Mouse hepatitis<sup>4</sup></b>                  | 30 (70)                                           | 29 (83)        | 29 (153)                                                |
| <b>Sendai<sup>4</sup></b>                           | 63 (70)                                           | 67 (85)        | 65 (155)                                                |
| <b><i>Mycoplasma pulmonis</i><sup>4</sup></b>       | 64 (70)                                           | 59 (85)        | 61 (155)                                                |

**Supplementary Table 3. Nematode, mite and microbial infections in wild mice.** Results are for the HW sample site.

<sup>1</sup>Median intensity for nematode and mite infection only.

<sup>2</sup>No significant effect of sex on the intensity of nematode infection ( $U = 4286$ ,  $n_{\text{female}} = 81$ ,  $n_{\text{male}} = 100$ ,  $P = 0.501$ ).

<sup>3</sup>No significant effect of sex on the intensity of mite infection ( $U = 4457$ ,  $n_{\text{female}} = 81$ ,  $n_{\text{male}} = 100$ ,  $P = 0.239$ ).

<sup>4</sup>No significant effect of sex on the number of detected microbial infections ( $U = 2819$ ,  $n_{\text{female}} = 70$ ,  $n_{\text{male}} = 83$ ,  $P = 0.749$ ).

|                            | Wild   |            |                 | Laboratory |           |                 |
|----------------------------|--------|------------|-----------------|------------|-----------|-----------------|
|                            | Mean   | Variance   | Variance / mean | Mean       | Variance  | Variance / mean |
| <b>IgG (µg/mL)</b>         | 8713.0 | 51146351.3 | 5870.1          | 904.8      | 4831155.9 | 5339.3          |
| <b>IgE (µg/mL)</b>         | 132.7  | 16682.2    | 125.7           | 0.99       | 7.4       | 7.4             |
| <b>IgA (µg/g)</b>          | 275.3  | 47024.5    | 170.8           | 231.0      | 5574.2    | 24.1            |
| <b>Haptoglobin (µg/mL)</b> | 36.3   | 14586.6    | 402.0           | 18.9       | 4508.6    | 237.8           |
| <b>SAP (µg/mL)</b>         | 1.9    | 1.64       | 0.85            | 1.2        | 0.28      | 0.23            |
| <b>AAT (µg/mL)</b>         | 252.2  | 26829.6    | 106.4           | 241.3      | 16528.8   | 68.5            |

**Supplementary Table 4. Serum protein concentrations in wild and laboratory mice.** The mean, variance and variance / mean ratio of serum protein concentrations. Results are for the HW sample site.

| Antigen                 | Cytokine       | Laboratory                                              | Wild                                                   | Lab. vs. Wild                 |
|-------------------------|----------------|---------------------------------------------------------|--------------------------------------------------------|-------------------------------|
| RPMI                    | IL-1 $\beta$   | 4.35 $\pm$ 15.44, 0.001<br>(0.001 – 66.16); 19          | 4.03 $\pm$ 12.56, 0.001<br>(0.001 – 72.490); 70        | $U = 712.5, P = 0.466$        |
|                         | IL-4           | 0.29 $\pm$ 0.53, 0.001<br>(0.001 – 1.860); 19           | 0.24 $\pm$ 0.29, 0.001<br>(0.001 – 0.840); 70          | $U = 703.0, P = 0.673$        |
|                         | IL-6           | 1.87 $\pm$ 3.71, 0.600<br>(0.001 – 15.910); 19          | 5.32 $\pm$ 13.10, 0.730<br>(0.001 – 82.370); 70        | $U = 741.5, P = 0.443$        |
|                         | IL-10          | 1.35 $\pm$ 3.68, 0.001<br>(0.001 – 14.650); 19          | 0.21 $\pm$ 0.88, 0.001<br>(0.001 – 4.790); 70          | $U = 544.0, P = 0.034^*$      |
|                         | IL-12p40       | 10.66 $\pm$ 11.92, 4.910<br>(0.001 – 37.270); 19        | 2.90 $\pm$ 3.74, 1.445<br>(0.001 – 14.940); 70         | $U = 348.0, P < 0.001^{***}$  |
|                         | IL-12p70       | 13.70 $\pm$ 20.75, 0.001<br>(0.001 – 79.050); 19        | 1.52 $\pm$ 6.42, 0.001<br>(0.001 – 37.890); 70         | $U = 427.5, P < 0.001^{***}$  |
|                         | IL-13          | 2.54 $\pm$ 5.67, 0.001<br>(0.001 – 16.020); 19          | 0.43 $\pm$ 2.23, 0.001<br>(0.001 – 16.020); 70         | $U = 552.5, P = 0.016^*$      |
|                         | IFN- $\gamma$  | 1.94 $\pm$ 4.26, 0.001<br>(0.001 – 15.830); 19          | 2.06 $\pm$ 12.52, 0.001<br>(0.001 – 104.550); 70       | $U = 699.0, P = 0.689$        |
|                         | MIP-2 $\alpha$ | 51.43 $\pm$ 103.63, 12.930<br>(0.150 – 435.360); 19     | 185.45 $\pm$ 446.31, 33.910<br>(0.340 – 3077.710); 70  | $U = 848.5, P = 0.066$        |
| Anti-CD3 /<br>Anti-CD28 | IL-1 $\beta$   | 5.02 $\pm$ 16.91, 0.001<br>(0.001 – 71.87); 19          | 7.71 $\pm$ 17.38, 0.001<br>(0.001 – 84.310); 71        | $U = 789.0, P = 0.182$        |
|                         | IL-4           | 9.27 $\pm$ 13.74, 2.51<br>(0.001 – 44.65); 19           | 70.72 $\pm$ 85.28, 39.750<br>(0.001 – 457.790); 71     | $U = 1169.5, P < 0.001^{***}$ |
|                         | IL-6           | 19.86 $\pm$ 26.92, 7.040<br>(0.001 – 105.670); 19       | 32.01 $\pm$ 62.06, 14.000<br>(0.001 – 343.930); 71     | $U = 794.0, P = 0.237$        |
|                         | IL-10          | 4.78 $\pm$ 7.08, 0.001<br>(0.001 – 22.750); 19          | 6.16 $\pm$ 14.31, 1.690<br>(0.001 – 109.810); 71       | $U = 777.0, P = 0.301$        |
|                         | IL-12p40       | 13.22 $\pm$ 12.27, 8.390<br>(0.001 – 46.460); 19        | 3.90 $\pm$ 3.71, 2.920<br>(0.001 – 15.400); 71         | $U = 297.5, P < 0.001^{***}$  |
|                         | IL-12p70       | 21.32 $\pm$ 27.28, 0.001<br>(0.001 – 65.840); 19        | 3.66 $\pm$ 11.79, 0.001<br>(0.001 – 70.480); 71        | $U = 556.0, P = 0.182$        |
|                         | IL-13          | 16.85 $\pm$ 26.42, 0.001<br>(0.001 – 88.200); 19        | 5.75 $\pm$ 22.93, 0.001<br>(0.001 – 187.540); 71       | $U = 541.0, P = 0.119$        |
|                         | IFN- $\gamma$  | 64.20 $\pm$ 118.05, 9.490<br>(0.001 – 456.100); 19      | 188.52 $\pm$ 277.00, 71.090<br>(0.001 – 1687.320); 71  | $U = 966.0, P = 0.004^{**}$   |
|                         | MIP-2 $\alpha$ | 70.86 $\pm$ 91.07, 35.75<br>(0.320 – 392.61); 19        | 288.25 $\pm$ 683.68, 114.700<br>(1.480 – 5471.880); 71 | $U = 1008.0, P < 0.001^{***}$ |
| CpG                     | IL-1 $\beta$   | 41.77 $\pm$ 53.01, 0.240<br>(0.001 – 135.10); 19        | 5.71 $\pm$ 13.41, 0.001<br>(0.001 – 53.77); 70         | $U = 445.5, P = 0.013^*$      |
|                         | IL-4           | 1.92 $\pm$ 2.21, 0.440<br>(0.001 – 5.650); 19           | 0.62 $\pm$ 1.22, 0.330<br>(0.001 – 7.110); 70          | $U = 521.0, P = 0.127$        |
|                         | IL-6           | 496.41 $\pm$ 519.76, 292.530<br>(2.630 – 1843.080); 19  | 294.52 $\pm$ 276.46, 228.900<br>(1.570 – 1440.260); 70 | $U = 546.0, P = 0.233$        |
|                         | IL-10          | 73.41 $\pm$ 90.66, 28.770<br>(0.001 – 267.330); 19      | 45.01 $\pm$ 49.96, 34.180<br>(0.001 – 377.240); 70     | $U = 664.0, P = 0.992$        |
|                         | IL-12p40       | 378.89 $\pm$ 341.09, 236.750<br>(10.300 – 1200.880); 19 | 197.30 $\pm$ 165.26, 163.850<br>(4.410 – 679.13); 70   | $U = 423.0, P = 0.015^*$      |
|                         | IL-12p70       | 68.14 $\pm$ 83.71, 0.790<br>(0.001 – 211.140); 19       | 9.69 $\pm$ 26.93, 0.056<br>(0.001 – 143.900); 70       | $U = 506.0, P = 0.091$        |
|                         | IL-13          | 37.58 $\pm$ 46.34, 1.490<br>(0.001 – 110.230); 19       | 4.39 $\pm$ 15.19, 0.001<br>(0.001 – 81.860); 70        | $U = 386.0, P < 0.001^{***}$  |
|                         | IFN- $\gamma$  | 15.10 $\pm$ 31.53, 3.140<br>(0.001 – 131.780); 19       | 13.28 $\pm$ 32.98, 1.040<br>(0.001 – 197.050); 70      | $U = 644.0, P = 0.833$        |
|                         | MIP-2 $\alpha$ | 111.71 $\pm$ 81.10, 107.00<br>(5.540 – 304.830); 19     | 172.26 $\pm$ 687.90, 44.055<br>(1.230 – 5716.820); 70  | $U = 460, P = 0.040^*$        |
| LPS                     | IL-1 $\beta$   | 6.73 $\pm$ 18.12, 0.001<br>(0.001 – 66.98); 19          | 4.75 $\pm$ 12.36, 0.001<br>(0.001 – 78.270); 70        | $U = 684.0, P = 0.823$        |
|                         | IL-4           | 0.87 $\pm$ 0.94, 0.47<br>(0.001 – 2.400); 19            | 0.34 $\pm$ 0.43, 0.230<br>(0.001 – 2.480); 70          | $U = 508.0, P = 0.98$         |
|                         | IL-6           | 26.41 $\pm$ 22.31, 20.480<br>(0.001 – 68.660); 19       | 20.51 $\pm$ 21.26, 13.500<br>(0.001 – 97.050); 70      | $U = 571.0, P = 0.347$        |
|                         | IL-10          | 20.18 $\pm$ 27.00, 2.060<br>(0.001 – 81.400); 19        | 6.44 $\pm$ 11.54, 3.630<br>(0.001 – 81.620); 70        | $U = 5805, P = 0.391$         |
|                         | IL-12p40       | 15.09 $\pm$ 14.52, 9.950<br>(0.130 – 51.220); 19        | 3.72 $\pm$ 2.78, 3.355<br>(0.001 – 12.190); 70         | $U = 2980, P < 0.001^{***}$   |
|                         | IL-12p70       | 22.02 $\pm$ 28.12, 0.001<br>(0.001 – 82.620); 19        | 1.53 $\pm$ 6.69, 0.001<br>(0.001 – 36.860); 70         | $U = 418.5, P < 0.001^{***}$  |
|                         | IL-13          | 11.93 $\pm$ 14.79, 0.001<br>(0.001 – 34.130); 19        | 1.10 $\pm$ 3.97, 0.001<br>(0.001 – 21.980); 70         | $U = 430.0, P < 0.001^{***}$  |
|                         | IFN- $\gamma$  | 3.36 $\pm$ 4.14, 0.230<br>(0.001 – 13.710); 19          | 3.65 $\pm$ 11.32, 0.570<br>(0.001 – 87.350); 70        | $U = 634.0, P = 0.753$        |
|                         | MIP-2 $\alpha$ | 143.03 $\pm$ 109.85, 111.58<br>(2.810 – 352.550); 19    | 185.53 $\pm$ 271.40, 112.510<br>(0.030 – 2068.290); 70 | $U = 679.0, P = 0.889$        |



|                      |                |                                                         |                                                           |                              |
|----------------------|----------------|---------------------------------------------------------|-----------------------------------------------------------|------------------------------|
| <b>Peptidoglycan</b> | IL-1 $\beta$   | 46.84 $\pm$ 58.00, 9.020<br>(0.001 – 161.21); 19        | 27.11 $\pm$ 28.99, 21.64<br>(0.001 – 150.790); 70         | $U = 680.0, P = 0.880$       |
|                      | IL-4           | 2.07 $\pm$ 2.40, 0.430<br>(0.001 – 5.920); 19           | 0.86 $\pm$ 1.24, 0.535<br>(0.001 – 5.950); 70             | $U = 577.0, P = 0.362$       |
|                      | IL-6           | 76.94 $\pm$ 98.54, 27.050<br>(0.001 – 285.560); 19      | 62.47 $\pm$ 74.21, 39.595<br>(0.450 – 349.730); 70        | $U = 680, P = 0.881$         |
|                      | IL-10          | 260.72 $\pm$ 286.37, 128.360<br>(42.550 – 1060.450); 19 | 180.13 $\pm$ 146.20, 140.725<br>(34.730 – 1032.360); 70   | $U = 665.0, P = 1.000$       |
|                      | IL-12p40       | 192.78 $\pm$ 294.21, 48.350<br>(11.340 – 1040.81); 19   | 52.05 $\pm$ 62.80, 33.420<br>(11.200 – 333.100); 70       | $U = 447.0, P = 0.029^*$     |
|                      | IL-12p70       | 97.53 $\pm$ 129.35, 9.610<br>(0.001 – 400.780); 19      | 13.39 $\pm$ 26.42, 5.235<br>(0.001 – 139.930); 70         | $U = 499.0, P = 0.096$       |
|                      | IL-13          | 32.28 $\pm$ 40.53, 0.001<br>(0.001 – 101.430); 19       | 3.28 $\pm$ 11.78, 0.001<br>(0.001 – 65.060); 70           | $U = 420.0, P < 0.001^{***}$ |
|                      | IFN- $\gamma$  | 47.98 $\pm$ 131.07, 1.140<br>(0.001 – 535.730); 19      | 16.83 $\pm$ 43.93, 1.630<br>(0.001 – 237.770); 70         | $U = 656.0, P = 0.928$       |
|                      | MIP-2 $\alpha$ | 15559.44 $\pm$ 1674.56,<br>(953.64 (9.0 – 5534.0); 19   | 2370.94 $\pm$ 4996.54, 999.92<br>(10.000 – 38832.000); 70 | $U = 730.0, P = 0.515$       |

**Supplementary Table 5. Statistical analyses of cytokine data.** Values are: mean  $\pm$  S.D., median, (range); sample size. Statistics are Mann-Whitney U-tests. Asterisks denote significant differences ( $*P < 0.05$ ,  $**P < 0.01$ ,  $***P < 0.001$ ). Results are for the HW sample site.

| Antibody                   | Fluorochrome                | Clone       | Source                      | Panel |
|----------------------------|-----------------------------|-------------|-----------------------------|-------|
| Fixable Live/Dead          | Aqua                        | N/A         | N/A                         | A-H   |
| Anti-CD3e                  | PE-Cy7                      | 145-2C11    | Armenian Hamster            | A, C  |
| Anti-CD4                   | APC-H7                      | GK1.5       | Rat                         | A, C  |
| Anti-CD8a                  | PerCP-Cy5.5                 | 53-6.7      | Rat                         | A, C  |
| Anti-CD11a                 | eFluor450                   | M17/4       | Rat                         | A, C  |
| Anti-CD49d                 | FITC                        | R1-2        | Rat                         | A     |
| Anti-CD44                  | APC                         | IM7         | Rat                         | A     |
| Anti-CD62L                 | PE                          | MEL-14      | Rat                         | A     |
| Anti-CD25                  | APC                         | PC61.5      | Rat                         | C     |
| Anti-FoxP3                 | FITC                        | FJK-16s     | Rat                         | C     |
| Anti-KLRG1                 | PE                          | 2F1         | <i>Mesocricetus auratus</i> | C     |
| Anti-CD3e                  | APC-eFluor780/<br>eFluor450 | 145-2C11    | Armenian Hamster            | D, F  |
| Anti-NKp46                 | eFluor450/ PE               | 29A1.4      | Rat                         | D, F  |
| Anti-CD11b                 | FITC                        | M1/70       | Rat                         | D     |
| Anti-CD27                  | PE/ APC                     | LG.7F9      | Armenian Hamster            | D     |
| Anti-CD11b                 | APC-eFluor780               | M1/70       | Armenian Hamster            | D     |
| Anti-CD69                  | PerCP-Cy5.5                 | H1.2F3      | <i>Mesocricetus auratus</i> | D     |
| Anti-KLRG1                 | PE-Cy7                      | 2F1         | Rat                         | D     |
| Anti-CD62L                 | APC-eFluor780               | MEL-14      | Rat                         | F     |
| Anti-Ly49D                 | APC                         | 4E5         | Rat                         | F     |
| Anti-Ly49G2                | PerCP-eFluor710             | 4D11        | Mouse                       | F     |
| Anti-Ly49H                 | FITC                        | 3D10        | Rat                         | F     |
| Anti-NKG2D                 | PE-Cy7                      | CX5         | Rat                         | F     |
| Anti-CD19                  | APC-eFluor780               | 1D3         | Rat                         | G     |
| Anti-CD38                  | APC                         | 90          | Rat                         | G     |
| Anti-GL7                   | eFluor450                   | GL-7        | Rat                         | G     |
| Anti-IgD                   | PE                          | 11-26c      | Rat                         | G     |
| Peanut Agglutinin<br>(PNA) | FITC                        | N/A         | N/A                         | G     |
| Anti-MHC-II                | PerCP-eFluor710             | M5/114.15.2 | Rat                         | G, H  |
| Anti-CD3e                  | PE-Cy7                      | 145-2C11    | Rat                         | H     |
| Anti-CD11c                 | FITC                        | N418        | Armenian Hamster            | H     |
| Anti-F4/80                 | APC                         | BM8         | Rat                         | H     |
| Anti-Ly6G                  | eFluor450                   | RB6-8C5     | Rat                         | H     |

**Supplementary Table 6. Antibodies, fluorochromes and staining panels used in the flow cytometry analyses.** Compensation control beads were from BD Biosciences (Oxford, UK). Intracellular staining with anti-FoxP3 was performed following permeabilization of cells using the permeabilization buffer from the e-Bioscience (Hartfield, UK) FoxP3 staining set.
